# Supplementary material for: Exploring Correlations of Food-Specific Disgust with Eating Disorder Psychopathology and Food Interaction: A Preliminary Study Using Virtual Reality
Source: MDPI journal article supplement (doi:10.3390/nu15204443), 2023-10-19

**Table S1. The list of virtual foods**

The description of food items with different calorie content in the virtual kitchen scenarios

|                          |                       |                      |                       |
|--------------------------|-----------------------|----------------------|-----------------------|
| Apple                    | Orange                | Pizza                | Pirate charms         |
| Black tea                | Pear                  | Raspberry            | Summer berry crisp    |
| Lager beer               | Pineapple             | Siracha              | Wheat crunchies       |
| Bread                    | Canned baked beans in | Spaghetti Bolognese  | Original chips        |
| Toast bread              | tomato sauce          | Sushi plate with soy | Cane sugar            |
| Chocolate chip cookie    | Canned baked beans    | White toast          | Cookie crumby         |
| Chocolate granola bar    | Canned garden peas    | Canned chicken soup  | Salt crackers         |
| Coffee beans             | Canned tinned tomato  | Cup noodle           | Bubble gum mega big   |
| Croissant                | Canned tuna chunks    | Macaroni and cheese  | Dark chocolate        |
| Draft beer               | Fusilli dried pasta   | Wheat flour          | Lollipops             |
| Egg sandwich             | Whole penne pasta     | Chocolate syrup      | Broccoli              |
| Crunch crisps            | Vanilla filled cake   | Whipped cream        | Cabbage               |
| Chicken nuggets          | Cheese                | Lemon sparkly drink  | Red bell pepper       |
| Chocolate ice cream      | Crème Fraiche         | Tomato ketchup       | Coffee                |
| Chocolate chip ice cream | Full-fat mayo         | Yellow mustard       | Fried eggs with bacon |
| Frozen chips             | Packed apple juice    | Raw sushi rolls      | Green soup            |
| Low fat strawberry       | Large eggs            | Red bell pepper      | Pepperoni             |
| yoghurt                  | Lightly salted butter | Carrot               | Peanut butter         |
|                          | Low fat milk          | Whole milk           | Fish fingers          |

## **Text S1. The script used in the virtual scenario: Kitchen + Avatar.**

You are likely to experience the tricks and torments of the eating disorder voice in this moment. The voice of people who recovered from the illness might be of great help in these difficult moments. The words I will share are their words.

It is normal to feel anxious, you are doing the best you can right now. Nobody is here to judge what you will do in the kitchen, which foods you will look at, or grab.

Take a few deep breaths, slow your mindset down and think of the bigger picture. Each minute more is a minute easier.

While challenging the eating disorder thoughts, remind yourself of all that you have achieved so far, the relationships you share, the passions and dreams you have, they are so important and will ultimately help you to break free of the eating disorder constraints. Focus on your skills and strengths right now. What would other people say are your skills and strengths? 3-second pause

Perhaps you are someone who, despite the setbacks and difficulties experienced in the past, is still fighting for a happier life? Perhaps you have helped others in the past, and could use some of the same strategies to encourage yourself in this moment? 3-second pause

Everyone else deserves good and balanced nutrition. Everyone else deserves to have a good relationship with food. What makes you different?

Food is not the enemy, think of it as nourishment for your body and food for your soul. Food provides the energy and motivation to allow you to perform at your best. Food is our medicine, and we cannot live without it.

The eating disorder might be speaking louder right now, but you are stronger than that.

You know your body better than anyone else, so be kind to it and you will learn to understand what it is truly asking. Be patient with yourself and this journey of change.

You are becoming the person you are, the person who has so much life to live for and to give to the world. You are taking steps towards freedom. It is tough, but the more you do, the closer you will be to freedom. Freedom from thinking about food all the time. Freedom from fear. Freedom from what other people might expect you to be.

Recovery is not linear, nor a perfect journey. Recovery is a battle, and you will become stronger and stronger along the way. Let other people in this battle, and it will become easier.

Remember the bigger picture. Remember why you want recovery and why you want to choose life over your eating disorder. Try to speak this motivation out loud now, as you approach the food.

Figure S1. The pictures of the virtual kitchen environment.

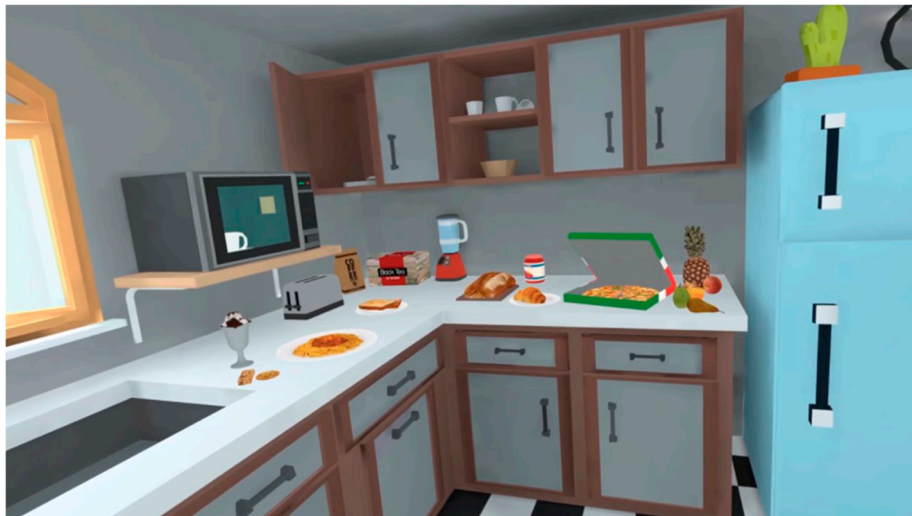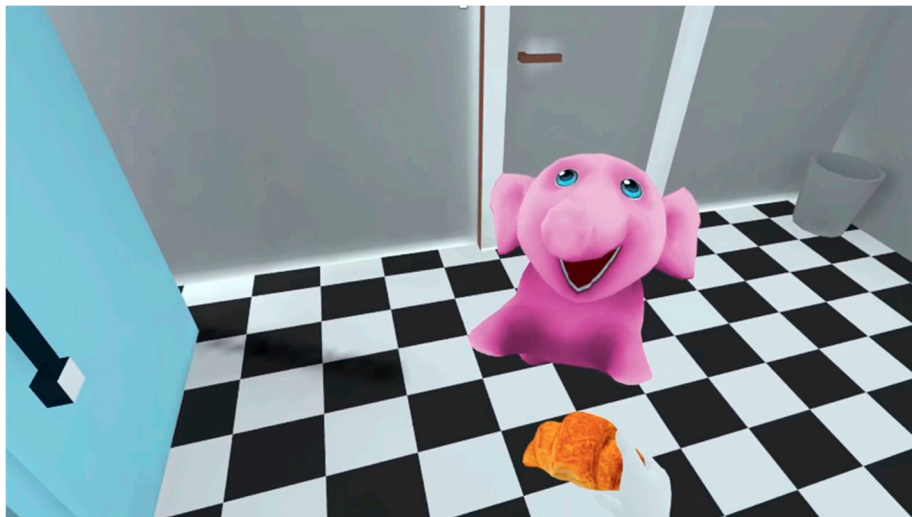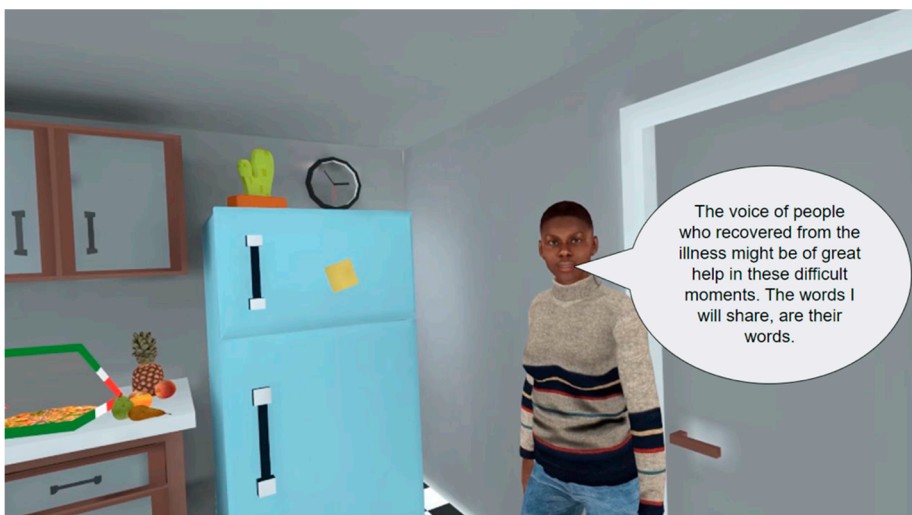

Figure S2. Selection of avatars available to participants

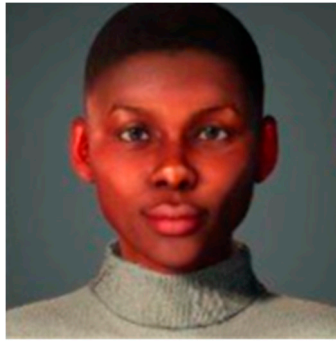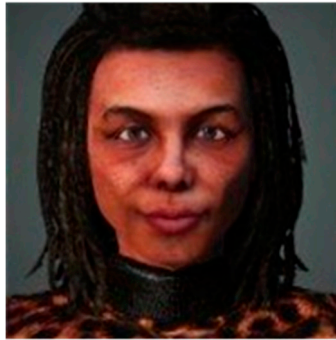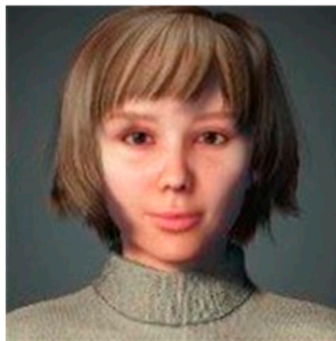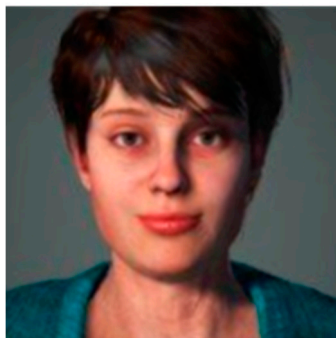

**Figure S3. SPSS output for spearman rank-order correlations**

(a) The variables of interest in the entire sample (n = 70)

|                                                             |            | Correlations            |                 |                 |                        |          |                   |          |                        |                        |          |             |        |          |            |             |         |       |        | VR_FoodGazes | VR_FoodTouches |
|-------------------------------------------------------------|------------|-------------------------|-----------------|-----------------|------------------------|----------|-------------------|----------|------------------------|------------------------|----------|-------------|--------|----------|------------|-------------|---------|-------|--------|--------------|----------------|
|                                                             |            | FDS_Global              | FDS_AnimalFlesh | FDS_PoorHygiene | FDS_HumanContamination | FDS_Mold | FDS_DecayingFruit | FDS_Fish | FDS_DecayingVegetables | FDS_LivingContaminants | PostExpD | EDEQ_Global | EDEQ_R | EDEQ_EAT | EDEQ_SHAPE | EDEQ_WEIGHT | BMI     |       |        |              |                |
| Spearman's rho                                              | FDS_Global | Correlation Coefficient | 1.000           | .498**          | .544**                 | .600**   | .785**            | .703**   | .815**                 | .714**                 | .577**   | .157        | .453** | .415**   | .232       | .526**      | .433**  | .145  | .250*  | -.218        |                |
|                                                             |            | Sig. (2-tailed)         |                 | <.001           | <.001                  | <.001    | <.001             | <.001    | <.001                  | <.001                  | <.001    | .204        | <.001  | <.001    | .053       | <.001       | <.001   | .232  | .037   | .070         |                |
|                                                             |            | N                       | 70              | 70              | 70                     | 70       | 70                | 70       | 70                     | 70                     | 70       | 70          | 70     | 70       | 70         | 70          | 70      | 70    | 70     | 70           |                |
| FDS_AnimalFlesh                                             | FDS_Global | Correlation Coefficient | .498**          | 1.000           | .287*                  | .266*    | .166              | -.010    | .653**                 | .115                   | .234     | .152        | .279*  | .262*    | .196       | .309**      | .214    | -.073 | .001   | -.085        |                |
|                                                             |            | Sig. (2-tailed)         | <.001           |                 | .016                   | .026     | .170              | .938     | <.001                  | .345                   | .051     | .219        | .019   | .029     | .104       | .009        | .076    | .546  | .996   | .486         |                |
|                                                             |            | N                       | 70              | 70              | 70                     | 70       | 70                | 70       | 70                     | 70                     | 70       | 70          | 70     | 70       | 70         | 70          | 70      | 70    | 70     | 70           |                |
| FDS_PoorHygiene                                             | FDS_Global | Correlation Coefficient | .544**          | .287*           | 1.000                  | .588**   | .292*             | .235     | .308**                 | .352**                 | .224     | .155        | .270*  | .340**   | .064       | .315**      | .251*   | -.029 | .113   | -.018        |                |
|                                                             |            | Sig. (2-tailed)         | <.001           | .016            |                        | <.001    | .014              | .051     | .009                   | .003                   | .062     | .211        | .024   | .004     | .596       | .008        | .036    | .813  | .351   | .885         |                |
|                                                             |            | N                       | 70              | 70              | 70                     | 70       | 70                | 70       | 70                     | 70                     | 70       | 70          | 70     | 70       | 70         | 70          | 70      | 70    | 70     | 70           |                |
| FDS_HumanContamination                                      | FDS_Global | Correlation Coefficient | .600**          | .266*           | .588**                 | 1.000    | .378**            | .240*    | .408**                 | .183                   | .339**   | .115        | .231   | .271*    | .078       | .268*       | .221    | -.189 | .119   | -.063        |                |
|                                                             |            | Sig. (2-tailed)         | <.001           | .026            | <.001                  |          | .001              | .045     | <.001                  | .130                   | .004     | .353        | .055   | .023     | .522       | .025        | .061    | .116  | .327   | .606         |                |
|                                                             |            | N                       | 70              | 70              | 70                     | 70       | 70                | 70       | 70                     | 70                     | 70       | 70          | 70     | 70       | 70         | 70          | 70      | 70    | 70     | 70           |                |
| FDS_Mold                                                    | FDS_Global | Correlation Coefficient | .785**          | .166            | .292*                  | .378**   | 1.000             | .659**   | .564**                 | .502**                 | .581**   | .077        | .422** | .397**   | .196       | .451**      | .429**  | .247* | .301*  | -.250*       |                |
|                                                             |            | Sig. (2-tailed)         | <.001           | .170            | .014                   | .001     |                   | <.001    | <.001                  | <.001                  | <.001    | .535        | <.001  | <.001    | .104       | <.001       | <.001   | .039  | .011   | .037         |                |
|                                                             |            | N                       | 70              | 70              | 70                     | 70       | 70                | 70       | 70                     | 70                     | 70       | 70          | 70     | 70       | 70         | 70          | 70      | 70    | 70     | 70           |                |
| FDS_DecayingFruit                                           | FDS_Global | Correlation Coefficient | .703**          | -.010           | .235                   | .240*    | .653**            | 1.000    | .442**                 | .704**                 | .289*    | -.006       | .238*  | .103     | .116       | .296*       | .290*   | .265* | .363** | -.119        |                |
|                                                             |            | Sig. (2-tailed)         | <.001           | .938            | .051                   | .045     | <.001             |          | <.001                  | <.001                  | .015     | .962        | .047   | .395     | .337       | .013        | .015    | .027  | .002   | .325         |                |
|                                                             |            | N                       | 70              | 70              | 70                     | 70       | 70                | 70       | 70                     | 70                     | 70       | 70          | 70     | 70       | 70         | 70          | 70      | 70    | 70     | 70           |                |
| FDS_Fish                                                    | FDS_Global | Correlation Coefficient | .815**          | .653**          | .308**                 | .408**   | .564**            | .442**   | 1.000                  | .488**                 | .380**   | .216        | .390** | .363**   | .226       | .441**      | .362**  | .080  | .042   | -.273*       |                |
|                                                             |            | Sig. (2-tailed)         | <.001           | <.001           | .009                   | <.001    | <.001             | <.001    |                        | <.001                  | .001     | .080        | <.001  | .002     | .060       | <.001       | .002    | .508  | .729   | .022         |                |
|                                                             |            | N                       | 70              | 70              | 70                     | 70       | 70                | 70       | 70                     | 70                     | 70       | 70          | 70     | 70       | 70         | 70          | 70      | 70    | 70     | 70           |                |
| FDS_DecayingVegetables                                      | FDS_Global | Correlation Coefficient | .714**          | .115            | .352*                  | .183     | .502*             | .704**   | .488**                 | 1.000                  | .345*    | .052        | .309*  | .269*    | .139       | .413**      | .320*   | .219  | .262*  | -.128        |                |
|                                                             |            | Sig. (2-tailed)         | <.001           | .345            | .003                   | .130     | <.001             | <.001    | <.001                  |                        | .003     | .675        | .009   | .024     | .250       | <.001       | .007    | .069  | .028   | .292         |                |
|                                                             |            | N                       | 70              | 70              | 70                     | 70       | 70                | 70       | 70                     | 70                     | 70       | 70          | 70     | 70       | 70         | 70          | 70      | 70    | 70     | 70           |                |
| FDS_LivingContaminants                                      | FDS_Global | Correlation Coefficient | .577**          | .234            | .224                   | .339**   | .581**            | .289*    | .380**                 | .345**                 | 1.000    | .031        | .146   | .207     | .020       | .218        | .121    | .215  | .209   | -.101        |                |
|                                                             |            | Sig. (2-tailed)         | <.001           | .051            | .062                   | .004     | <.001             | .015     | .001                   | .003                   |          | .806        | .228   | .086     | .869       | .070        | .317    | .073  | .083   | .406         |                |
|                                                             |            | N                       | 70              | 70              | 70                     | 70       | 70                | 70       | 70                     | 70                     | 70       | 70          | 70     | 70       | 70         | 70          | 70      | 70    | 70     | 70           |                |
| PostExpD                                                    | FDS_Global | Correlation Coefficient | .157            | .152            | .155                   | .115     | .077              | -.006    | .216                   | .052                   | .031     | 1.000       | .655** | .623**   | .577**     | .603**      | .529**  | -.043 | -.127  | -.160        |                |
|                                                             |            | Sig. (2-tailed)         | .204            | .219            | .211                   | .353     | .535              | .962     | .080                   | .675                   | .806     |             | <.001  | <.001    | <.001      | <.001       | <.001   | .732  | .306   | .196         |                |
|                                                             |            | N                       | 70              | 70              | 70                     | 70       | 70                | 70       | 70                     | 70                     | 70       | 70          | 70     | 70       | 70         | 70          | 70      | 70    | 70     | 70           |                |
| EDEQ_Global                                                 | FDS_Global | Correlation Coefficient | .453**          | .279*           | .270*                  | .231     | .422*             | .238*    | .390**                 | .309**                 | .146     | .655**      | 1.000  | .843**   | .854**     | .905**      | .910**  | -.004 | -.160  | -.354**      |                |
|                                                             |            | Sig. (2-tailed)         | <.001           | .019            | .024                   | .055     | <.001             | .047     | <.001                  | .009                   | .228     | <.001       |        | <.001    | <.001      | <.001       | <.001   | .977  | .186   | .003         |                |
|                                                             |            | N                       | 70              | 70              | 70                     | 70       | 70                | 70       | 70                     | 70                     | 70       | 70          | 70     | 70       | 70         | 70          | 70      | 70    | 70     | 70           |                |
| EDEQ_R                                                      | FDS_Global | Correlation Coefficient | .415**          | .262*           | .340**                 | .271*    | .397**            | .103     | .363**                 | .269*                  | .207     | .623**      | .843** | 1.000    | .619**     | .720**      | .690**  | -.134 | -.224  | -.278*       |                |
|                                                             |            | Sig. (2-tailed)         | <.001           | .029            | .004                   | .023     | <.001             | .395     | .002                   | .024                   | .086     | <.001       | <.001  |          | <.001      | <.001       | <.001   | .268  | .062   | .020         |                |
|                                                             |            | N                       | 70              | 70              | 70                     | 70       | 70                | 70       | 70                     | 70                     | 70       | 70          | 70     | 70       | 70         | 70          | 70      | 70    | 70     | 70           |                |
| EDEQ_EAT                                                    | FDS_Global | Correlation Coefficient | .232            | .196            | .064                   | .078     | .196              | .116     | .226                   | .139                   | .020     | .577**      | .854** | .619**   | 1.000      | .654**      | .680**  | .029  | .298*  | -.281        |                |
|                                                             |            | Sig. (2-tailed)         | .053            | .104            | .596                   | .522     | .104              | .337     | .060                   | .250                   | .869     | <.001       | <.001  | <.001    |            | <.001       | <.001   | .809  | .012   | .019         |                |
|                                                             |            | N                       | 70              | 70              | 70                     | 70       | 70                | 70       | 70                     | 70                     | 70       | 70          | 70     | 70       | 70         | 70          | 70      | 70    | 70     | 70           |                |
| EDEQ_SHAPE                                                  | FDS_Global | Correlation Coefficient | .526**          | .309**          | .315**                 | .268*    | .451**            | .296*    | .441**                 | .413**                 | .218     | .603**      | .905** | .720**   | .654**     | 1.000       | .883**  | .091  | -.015  | -.310**      |                |
|                                                             |            | Sig. (2-tailed)         | <.001           | .009            | .008                   | .025     | <.001             | .013     | <.001                  | <.001                  | .070     | <.001       | <.001  | <.001    | <.001      |             | <.001   | .454  | .899   | .009         |                |
|                                                             |            | N                       | 70              | 70              | 70                     | 70       | 70                | 70       | 70                     | 70                     | 70       | 70          | 70     | 70       | 70         | 70          | 70      | 70    | 70     | 70           |                |
| EDEQ_WEIGHT                                                 | FDS_Global | Correlation Coefficient | .433**          | .214            | .251*                  | .225     | .429*             | .290*    | .362**                 | .320**                 | .121     | .529**      | .910** | .690**   | .680**     | .883**      | 1.000   | .057  | -.020  | -.335**      |                |
|                                                             |            | Sig. (2-tailed)         | <.001           | .076            | .036                   | .061     | <.001             | .015     | .002                   | .007                   | .317     | <.001       | <.001  | <.001    | <.001      | <.001       |         | .639  | .871   | .005         |                |
|                                                             |            | N                       | 70              | 70              | 70                     | 70       | 70                | 70       | 70                     | 70                     | 70       | 70          | 70     | 70       | 70         | 70          | 70      | 70    | 70     | 70           |                |
| BMI                                                         | FDS_Global | Correlation Coefficient | .145            | -.073           | -.029                  | -.189    | .247*             | .265*    | .080                   | .219                   | .215     | -.043       | -.004  | -.134    | -.029      | .091        | .057    | 1.000 | .268*  | -.070        |                |
|                                                             |            | Sig. (2-tailed)         | .232            | .546            | .813                   | .116     | .039              | .927     | .508                   | .069                   | .073     | .732        | .977   | .268     | .809       | .454        | .639    |       | .025   | .564         |                |
|                                                             |            | N                       | 70              | 70              | 70                     | 70       | 70                | 70       | 70                     | 70                     | 70       | 70          | 70     | 70       | 70         | 70          | 70      | 70    | 70     | 70           |                |
| VR_FoodGazes                                                | FDS_Global | Correlation Coefficient | .250*           | .001            | .113                   | .119     | .301*             | .363**   | .042                   | .262*                  | .209     | -.127       | -.160  | -.224    | -.298*     | -.015       | -.020   | .268* | 1.000  | .333**       |                |
|                                                             |            | Sig. (2-tailed)         | .037            | .996            | .351                   | .327     | .011              | .002     | .729                   | .028                   | .083     | .306        | .186   | .062     | .012       | .899        | .871    | .025  |        | .005         |                |
|                                                             |            | N                       | 70              | 70              | 70                     | 70       | 70                | 70       | 70                     | 70                     | 70       | 70          | 70     | 70       | 70         | 70          | 70      | 70    | 70     | 70           |                |
| VR_FoodTouches                                              | FDS_Global | Correlation Coefficient | -.218           | -.085           | -.018                  | -.063    | -.250*            | -.119    | -.273*                 | -.128                  | -.101    | -.160       | -.354* | -.278*   | -.281*     | -.310*      | -.335** | -.070 | .333*  | 1.000        |                |
|                                                             |            | Sig. (2-tailed)         | .070            | .486            | .885                   | .606     | .037              | .325     | .022                   | .292                   | .406     | .196        | .003   | .020     | .019       | .009        | .005    | .564  | .005   |              |                |
|                                                             |            | N                       | 70              | 70              | 70                     | 70       | 70                | 70       | 70                     | 70                     | 70       | 70          | 70     | 70       | 70         | 70          | 70      | 70    | 70     | 70           |                |
| ** Correlation is significant at the 0.01 level (2-tailed). |            |                         |                 |                 |                        |          |                   |          |                        |                        |          |             |        |          |            |             |         |       |        |              |                |
| * Correlation is significant at the 0.05 level (2-tailed).  |            |                         |                 |                 |                        |          |                   |          |                        |                        |          |             |        |          |            |             |         |       |        |              |                |

\*\*, Correlation is significant at the 0.01 level (2-tailed).  
\*, Correlation is significant at the 0.05 level (2-tailed).

(b) The variables of interest in the only virtual kitchen scenario (n = 24)

|                        |                         | Correlations            |                 |                 |                        |          |                   |          |                        |                        |          |             |        |          |            |             |        |              |                |        |  |  |
|------------------------|-------------------------|-------------------------|-----------------|-----------------|------------------------|----------|-------------------|----------|------------------------|------------------------|----------|-------------|--------|----------|------------|-------------|--------|--------------|----------------|--------|--|--|
|                        |                         | FDS_Global              | FDS_AnimalFlesh | FDS_PoorHygiene | FDS_HumanContamination | FDS_Mold | FDS_DecayingFruit | FDS_Fish | FDS_DecayingVegetables | FDS_LivingContaminants | PostExpD | EDEQ_Global | EDEQ_R | EDEQ_EAT | EDEQ_SHAPE | EDEQ_WEIGHT | BMI    | VR_FoodGazes | VR_FoodTouches |        |  |  |
| Kitchen                | FDS_Global              | Correlation Coefficient | 1.000           | .623**          | .488*                  | .488*    | .760**            | .609**   | .866**                 | .544**                 | .361     | .139        | .533** | .428*    | .321       | .542**      | .590** | .047         | .110           | -.357* |  |  |
|                        |                         | Sig. (2-tailed)         |                 | .001            | .016                   | .016     | <.001             | .002     | <.001                  | .006                   | .083     | .517        | .007   | .037     | .126       | .006        | .002   | .828         | .609           | .087   |  |  |
|                        |                         | N                       | 24              | 24              | 24                     | 24       | 24                | 24       | 24                     | 24                     | 24       | 24          | 24     | 24       | 24         | 24          | 24     | 24           | 24             | 24     |  |  |
| FDS_AnimalFlesh        | Correlation Coefficient | .623**                  | 1.000           | .364            | .365                   | .344     | -.089             | .606**   | .103                   | .364                   | .137     | .289        | .301   | .102     | .309       | .265        | -.179  | .246         | -.069          |        |  |  |
|                        |                         | Sig. (2-tailed)         | .001            |                 | .081                   | .080     | .100              | .681     | .002                   | .631                   | .080     | .524        | .170   | .154     | .635       | .141        | .211   | .402         | .247           | .750   |  |  |
|                        |                         | N                       | 24              | 24              | 24                     | 24       | 24                | 24       | 24                     | 24                     | 24       | 24          | 24     | 24       | 24         | 24          | 24     | 24           | 24             | 24     |  |  |
| FDS_PoorHygiene        | Correlation Coefficient | .488*                   | .364            | 1.000           | .550**                 | .235     | .067              | .195     | .208                   | .149                   | -.034    | .260        | .372   | .097     | .181       | .186        | -.204  | .010         | -.017          |        |  |  |
|                        |                         | Sig. (2-tailed)         | .016            | .081            |                        | .005     | .269              | .756     | .362                   | .329                   | .488     | .875        | .219   | .074     | .651       | .398        | .383   | .339         | .965           | .936   |  |  |
|                        |                         | N                       | 24              | 24              | 24                     | 24       | 24                | 24       | 24                     | 24                     | 24       | 24          | 24     | 24       | 24         | 24          | 24     | 24           | 24             | 24     |  |  |
| FDS_HumanContamination | Correlation Coefficient | .488*                   | .365            | .550**          | 1.000                  | .272     | .085              | .371*    | -.154                  | .334                   | -.037    | .094        | .101   | -.024    | -.001      | .171        | -.266  | -.054        | -.015          |        |  |  |
|                        |                         | Sig. (2-tailed)         | .016            | .080            | .005                   |          | .198              | .693     | .074                   | .472                   | .111     | .862        | .662   | .638     | .911       | .997        | .424   | .210         | .801           | .945   |  |  |
|                        |                         | N                       | 24              | 24              | 24                     | 24       | 24                | 24       | 24                     | 24                     | 24       | 24          | 24     | 24       | 24         | 24          | 24     | 24           | 24             | 24     |  |  |
| FDS_Mold               | Correlation Coefficient | .760**                  | .344            | .235            | .272                   | 1.000    | .486*             | .741**   | .247                   | .451*                  | .159     | .633**      | .569** | .320     | .584**     | .668**      | .246   | .038         | -.552**        |        |  |  |
|                        |                         | Sig. (2-tailed)         | <.001           | .100            | .269                   | .198     |                   | .016     | <.001                  | .245                   | .027     | .457        | <.001  | .004     | .127       | .003        | <.001  | .246         | .859           | .005   |  |  |
|                        |                         | N                       | 24              | 24              | 24                     | 24       | 24                | 24       | 24                     | 24                     | 24       | 24          | 24     | 24       | 24         | 24          | 24     | 24           | 24             | 24     |  |  |
| FDS_DecayingFruit      | Correlation Coefficient | .606**                  | .103            | .067            | .085                   | .486*    | 1.000             | .499**   | .626**                 | -.145*                 | .089     | .226*       | -.021  | .262     | .258       | .363        | .302   | .048         | -.382          |        |  |  |
|                        |                         | Sig. (2-tailed)         | .002            | .681            | .756                   | .693     | .016              |          | .013                   | .001                   | .500     | .691        | .281   | .922     | .216       | .223        | .082   | .151         | .822           | .066   |  |  |
|                        |                         | N                       | 24              | 24              | 24                     | 24       | 24                | 24       | 24                     | 24                     | 24       | 24          | 24     | 24       | 24         | 24          | 24     | 24           | 24             | 24     |  |  |
| FDS_Fish               | Correlation Coefficient | .866**                  | .606**          | .195            | .371                   | .741**   | .499*             | 1.000    | .300                   | .344                   | .237     | .421*       | .361   | .210     | .423*      | .483*       | .010   | .007         | -.489*         |        |  |  |
|                        |                         | Sig. (2-tailed)         | <.001           | .002            | .362                   | .074     | <.001             | .013     |                        | .154                   | .100     | .266        | .040   | .083     | .325       | .040        | .017   | .964         | .976           | .015   |  |  |
|                        |                         | N                       | 24              | 24              | 24                     | 24       | 24                | 24       | 24                     | 24                     | 24       | 24          | 24     | 24       | 24         | 24          | 24     | 24           | 24             | 24     |  |  |
| FDS_DecayingVegetables | Correlation Coefficient | .544**                  | .103            | .208            | .242                   | .244     | .634**            | .300     | 1.000                  | .005                   | .100     | .005        | .364   | .167     | .310       | .522**      | .429   | .216         | .114           | -.056  |  |  |
|                        |                         | Sig. (2-tailed)         | .006            | .631            | .329                   | .472     | .245              | .001     | .154                   |                        | .638     | .980        | .080   | .434     | .140       | .009        | .036   | .311         | .595           | .796   |  |  |
|                        |                         | N                       | 24              | 24              | 24                     | 24       | 24                | 24       | 24                     | 24                     | 24       | 24          | 24     | 24       | 24         | 24          | 24     | 24           | 24             | 24     |  |  |
| FDS_LivingContaminants | Correlation Coefficient | .361                    | .364            | .149            | .334                   | .451*    | -.145             | .344     | -.101                  | 1.000                  | .086     | .084        | .229   | -.128    | .081       | .104        | .017   | .140         | -.244          |        |  |  |
|                        |                         | Sig. (2-tailed)         | .083            | .080            | .488                   | .111     | .027              | .500     | .100                   | .638                   |          | .689        | .697   | .283     | .552       | .705        | .629   | .937         | .515           | .251   |  |  |
|                        |                         | N                       | 24              | 24              | 24                     | 24       | 24                | 24       | 24                     | 24                     | 24       | 24          | 24     | 24       | 24         | 24          | 24     | 24           | 24             | 24     |  |  |
| PostExpD               | Correlation Coefficient | .139                    | .137            | .034            | .159                   | -.086    | .237              | .007     | .086                   | 1.000                  | .399     | .467        | .382   | .169     | .318       | .169        | .108   | -.269        | -.140          |        |  |  |
|                        |                         | Sig. (2-tailed)         | .517            | .524            | .875                   | .862     | .457              | .691     | .266                   | .980                   | .689     |             | .053   | .022     | .065       | .086        | .442   | .859         | .203           | .513   |  |  |
|                        |                         | N                       | 24              | 24              | 24                     | 24       | 24                | 24       | 24                     | 24                     | 24       | 24          | 24     | 24       | 24         | 24          | 24     | 24           | 24             | 24     |  |  |
| EDEQ_Global            | Correlation Coefficient | .533**                  | .289            | .260            | .094                   | .633*    | .229              | .421*    | .364                   | .084                   | .399     | 1.000       | .877** | .797**   | .858**     | .851**      | .019   | -.333        | -.309          |        |  |  |
|                        |                         | Sig. (2-tailed)         | .007            | .170            | .219                   | .662     | <.001             | .281     | .040                   | .080                   | .697     | .053        |        | <.001    | <.001      | <.001       | <.001  | .929         | .112           | .141   |  |  |
|                        |                         | N                       | 24              | 24              | 24                     | 24       | 24                | 24       | 24                     | 24                     | 24       | 24          | 24     | 24       | 24         | 24          | 24     | 24           | 24             | 24     |  |  |
| EDEQ_R                 | Correlation Coefficient | .302                    | .301            | .372            | .101                   | .569*    | .871**            | .167*    | .229                   | .467*                  | .877**   | 1.000       | .598** | .735**   | .599**     | .599**      | .125   | .377         | -.269          |        |  |  |
|                        |                         | Sig. (2-tailed)         | .037            | .154            | .074                   | .638     | .004              | .922     | .083                   | .434                   | .283     | .022        | <.001  |          | .002       | <.001       | .002   | .559         | .070           | .203   |  |  |
|                        |                         | N                       | 24              | 24              | 24                     | 24       | 24                | 24       | 24                     | 24                     | 24       | 24          | 24     | 24       | 24         | 24          | 24     | 24           | 24             | 24     |  |  |
| EDEQ_EAT               | Correlation Coefficient | .321                    | .102            | .097            | -.024                  | .320     | .262              | .210     | .310                   | -.128                  | .362     | .797**      | .598** | 1.000    | .488*      | .558**      | -.079  | -.422*       | -.130          |        |  |  |
|                        |                         | Sig. (2-tailed)         | .126            | .635            | .651                   | .911     | .127              | .216     | .325                   | .140                   | .552     | .065        | <.001  | .002     |            | .016        | .005   | .714         | .040           | .545   |  |  |
|                        |                         | N                       | 24              | 24              | 24                     | 24       | 24                | 24       | 24                     | 24                     | 24       | 24          | 24     | 24       | 24         | 24          | 24     | 24           | 24             | 24     |  |  |
| EDEQ_SHAPE             | Correlation Coefficient | .501                    | .309            | .001            | -.081                  | -.581**  | .258              | .423*    | .522**                 | .088                   | .358     | .858**      | .748   | .488*    | 1.000      | .864**      | .208   | .140         | -.276          |        |  |  |
|                        |                         | Sig. (2-tailed)         | .006            | .141            | .398                   | .997     | .003              | .223     | .040                   | .009                   | .705     | .086        | <.001  | <.001    | .016       |             | <.001  | .330         | .514           | .192   |  |  |
|                        |                         | N                       | 24              | 24              | 24                     | 24       | 24                | 24       | 24                     | 24                     | 24       | 24          | 24     | 24       | 24         | 24          | 24     | 24           | 24             | 24     |  |  |
| EDEQ_WEIGHT            | Correlation Coefficient | .590**                  | .265            | .186            | .171                   | .668*    | .362              | .483*    | .429*                  | .104                   | .165     | .851**      | .599** | .558**   | .864**     | 1.000       | .147   | -.102        | -.294          |        |  |  |
|                        |                         | Sig. (2-tailed)         | .002            | .211            | .383                   | .424     | <.001             | .082     | .017                   | .036                   | .629     | .442        | <.001  | .002     | .005       | <.001       |        | .493         | .635           | .163   |  |  |
|                        |                         | N                       | 24              | 24              | 24                     | 24       | 24                | 24       | 24                     | 24                     | 24       | 24          | 24     | 24       | 24         | 24          | 24     | 24           | 24             | 24     |  |  |
| BMI                    | Correlation Coefficient | .047                    | -.179           | -.204           | -.266                  | .246     | .302              | .010     | .216                   | .017                   | -.038    | .019        | -.125  | -.079    | .206       | .147        | 1.000  | .115         | -.357          |        |  |  |
|                        |                         | Sig. (2-tailed)         | .825            | .402            | .319                   | .210     | .246              | .151     | .964                   | .711                   | .319     | .859        | .929   | .578     | .711       | .319        |        | .592         | .087           | .087   |  |  |
|                        |                         | N                       | 24              | 24              | 24                     | 24       | 24                | 24       | 24                     | 24                     | 24       | 24          | 24     | 24       | 24         | 24          | 24     | 24           | 24             | 24     |  |  |
| VR_FoodGazes           | Correlation Coefficient | .110                    | .246            | .010            | -.054                  | .038     | .048              | .007     | .114                   | .140                   | -.269    | -.333       | -.377  | -.422*   | -.140      | -.102       | .115   | 1.000        | .331           |        |  |  |
|                        |                         | Sig. (2-tailed)         | .609            | .247            | .965                   | .801     | .859              | .822     | .976                   | .595                   | .515     | .203        | .112   | .070     | .040       | .514        | .635   | .592         |                | .114   |  |  |
|                        |                         | N                       | 24              | 24              | 24                     | 24       | 24                | 24       | 24                     | 24                     | 24       | 24          | 24     | 24       | 24         | 24          | 24     | 24           | 24             | 24     |  |  |
| VR_FoodTouches         | Correlation Coefficient | -.357*                  | -.069           | -.017           | -.010                  | -.552**  | -.382             | -.489*   | -.242                  | -.140                  | -.309    | .269        | -.056  | -.130    | -.276      | -.347       | -.331  | 1.000        |                |        |  |  |
|                        |                         | Sig. (2-tailed)         | .087            | .750            | .936                   | .945     | .005              | .066     | .015                   | .796                   | .251     | .513        | .141   | .203     | .545       | .192        | .163   | .087         |                | .114   |  |  |
|                        |                         | N                       | 24              | 24              | 24                     | 24       | 24                | 24       | 24                     | 24                     | 24       | 24          | 24     | 24       | 24         | 24          | 24     | 24           | 24             | 24     |  |  |



(c) The variables of interest in the virtual kitchen + pet scenario (n = 24)

|               |                        | Correlations            |                 |                 |                        |          |                   |          |                        |                        |          |             |        |          |            |             |        |              |                |
|---------------|------------------------|-------------------------|-----------------|-----------------|------------------------|----------|-------------------|----------|------------------------|------------------------|----------|-------------|--------|----------|------------|-------------|--------|--------------|----------------|
|               |                        | FDS_Global              | FDS_AnimalFlesh | FDS_PoorHygiene | FDS_HumanContamination | FDS_Mold | FDS_DecayingFruit | FDS_Fish | FDS_DecayingVegetables | FDS_LivingContaminants | PostExpD | EDEQ_Global | EDEQ_R | EDEQ_EAT | EDEQ_SHAPE | EDEQ_WEIGHT | BMI    | VR_FoodGazes | VR_FoodTouches |
| Kitchen + Pet | FDS_Global             | Correlation Coefficient | 1.000           | .376            | .577**                 | .718**   | .875**            | .851**   | .837**                 | .870**                 | .682**   | .158        | .334   | .420*    | -.050      | .566*       | .337   | .095         | .659**         |
|               |                        | Sig. (2-tailed)         |                 | .070            | .003                   | <.001    | <.001             | <.001    | <.001                  | <.001                  | <.001    | .494        | .111   | .041     | .818       | .004        | .107   | .659         | <.001          |
|               | FDS_AnimalFlesh        | Correlation Coefficient |                 | 1.000           | .076                   | .228     | .151              | .035     | .624**                 | .277                   | .266     | -.109       | .215   | .245     | .118       | .252        | .171   | .151         | .007           |
|               |                        | Sig. (2-tailed)         |                 |                 | .725                   | .285     | .482              | .869     | .001                   | .189                   | .209     | .637        | .314   | .249     | .582       | .236        | .424   | .481         | .973           |
|               | FDS_PoorHygiene        | Correlation Coefficient |                 |                 | 1.000                  | .722**   | .525**            | .534**   | .331                   | .435*                  | .308     | .313        | .298   | .408*    | -.099      | .413*       | .354   | .133         | .344           |
|               |                        | Sig. (2-tailed)         |                 |                 |                        | <.001    | .008              | .007     | .115                   | .033                   | .143     | .167        | .158   | .048     | .645       | .045        | .090   | .536         | .100           |
|               | FDS_HumanContamination | Correlation Coefficient |                 |                 |                        | 1.000    | .592**            | .506*    | .537**                 | .485**                 | .331     | .315        | .477*  | .441*    | .098       | .661**      | .371   | -.112        | .404*          |
|               |                        | Sig. (2-tailed)         |                 |                 |                        |          | .002              | .012     | .007                   | .016                   | .114     | .165        | .018   | .031     | .649       | <.001       | .074   | .604         | .050           |
|               | FDS_Mold               | Correlation Coefficient |                 |                 |                        |          | 1.000             | .855**   | .621*                  | .768**                 | .761**   | .127        | .258   | .361     | -.080      | .478*       | .328   | .289         | .744**         |
|               |                        | Sig. (2-tailed)         |                 |                 |                        |          |                   | <.001    | .001                   | <.001                  | <.001    | .584        | .224   | .083     | .711       | .018        | .118   | .171         | <.001          |
|               | FDS_DecayingFruit      | Correlation Coefficient |                 |                 |                        |          |                   | 1.000    | .594**                 | .778**                 | .630**   | .133        | .183   | .248     | -.073      | .412*       | .251   | .103         | .642**         |
|               |                        | Sig. (2-tailed)         |                 |                 |                        |          |                   |          | .002                   | <.001                  | <.001    | .566        | .391   | .243     | .734       | .045        | .237   | .631         | <.001          |
|               | FDS_Fish               | Correlation Coefficient |                 |                 |                        |          |                   |          | 1.000                  | .788**                 | .492*    | -.120       | .101   | .163     | -.151      | .345        | .099   | .153         | .426*          |
|               |                        | Sig. (2-tailed)         |                 |                 |                        |          |                   |          |                        | <.001                  | .014     | .603        | .638   | .447     | .481       | .099        | .645   | .477         | .038           |
|               | FDS_DecayingVegetables | Correlation Coefficient |                 |                 |                        |          |                   |          |                        | 1.000                  | .614*    | .169        | .305   | .399     | -.022      | .545*       | .361   | .108         | .560*          |
|               |                        | Sig. (2-tailed)         |                 |                 |                        |          |                   |          |                        |                        | .001     | .464        | .148   | .053     | .918       | .006        | .083   | .616         | .004           |
|               | FDS_LivingContaminants | Correlation Coefficient |                 |                 |                        |          |                   |          |                        |                        | 1.000    | -.082       | .083   | .149     | -.113      | .340        | .115   | .447*        | .497*          |
|               |                        | Sig. (2-tailed)         |                 |                 |                        |          |                   |          |                        |                        |          | .722        | .700   | .487     | .599       | .104        | .592   | .029         | .013           |
|               | PostExpD               | Correlation Coefficient |                 |                 |                        |          |                   |          |                        |                        |          | 1.000       | .802** | .731**   | .699**     | .670**      | .698** | -.363        | .166           |
|               |                        | Sig. (2-tailed)         |                 |                 |                        |          |                   |          |                        |                        |          |             | <.001  | <.001    | <.001      | <.001       | <.001  | .106         | .473           |
|               | EDEQ_Global            | Correlation Coefficient |                 |                 |                        |          |                   |          |                        |                        |          |             | 1.000  | .863**   | .812**     | .877**      | .933** | -.419*       | .092           |
|               |                        | Sig. (2-tailed)         |                 |                 |                        |          |                   |          |                        |                        |          |             |        | <.001    | <.001      | <.001       | <.001  | .041         | .668           |
|               | EDEQ_R                 | Correlation Coefficient |                 |                 |                        |          |                   |          |                        |                        |          |             |        | 1.000    | .533**     | .714**      | .819** | -.296        | .230           |
|               |                        | Sig. (2-tailed)         |                 |                 |                        |          |                   |          |                        |                        |          |             |        |          | <.001      | <.001       | <.001  | .160         | .279           |
|               | EDEQ_EAT               | Correlation Coefficient |                 |                 |                        |          |                   |          |                        |                        |          |             |        |          | 1.000      | .592*       | .705** | -.419*       | -.621*         |
|               |                        | Sig. (2-tailed)         |                 |                 |                        |          |                   |          |                        |                        |          |             |        |          |            | .002        | <.001  | .042         | .525           |
|               | EDEQ_SHAPE             | Correlation Coefficient |                 |                 |                        |          |                   |          |                        |                        |          |             |        |          |            | 1.000       | .809** | -.240        | .242           |
|               |                        | Sig. (2-tailed)         |                 |                 |                        |          |                   |          |                        |                        |          |             |        |          |            |             | <.001  | .258         | .255           |
|               | EDEQ_WEIGHT            | Correlation Coefficient |                 |                 |                        |          |                   |          |                        |                        |          |             |        |          |            |             | 1.000  | -.318        | .122           |
|               |                        | Sig. (2-tailed)         |                 |                 |                        |          |                   |          |                        |                        |          |             |        |          |            |             |        | .130         | .571           |
|               | BMI                    | Correlation Coefficient |                 |                 |                        |          |                   |          |                        |                        |          |             |        |          |            |             |        | .130         | .571           |
|               |                        | Sig. (2-tailed)         |                 |                 |                        |          |                   |          |                        |                        |          |             |        |          |            |             |        | .130         | .571           |
|               | VR_FoodGazes           | Correlation Coefficient |                 |                 |                        |          |                   |          |                        |                        |          |             |        |          |            |             |        | .130         | .571           |
|               |                        | Sig. (2-tailed)         |                 |                 |                        |          |                   |          |                        |                        |          |             |        |          |            |             |        | .130         | .571           |
|               | VR_FoodTouches         | Correlation Coefficient |                 |                 |                        |          |                   |          |                        |                        |          |             |        |          |            |             |        | .130         | .571           |
|               |                        | Sig. (2-tailed)         |                 |                 |                        |          |                   |          |                        |                        |          |             |        |          |            |             |        | .130         | .571           |

\*\*, Correlation is significant at the 0.01 level (2-tailed).

\*, Correlation is significant at the 0.05 level (2-tailed).

(d) The variables of interest in the virtual kitchen + avatar scenario (n = 22)

|                  |                        | Correlations            |                 |                 |                        |          |                   |          |                        |                        |          |             |        |          |            |             |        |              |                |
|------------------|------------------------|-------------------------|-----------------|-----------------|------------------------|----------|-------------------|----------|------------------------|------------------------|----------|-------------|--------|----------|------------|-------------|--------|--------------|----------------|
|                  |                        | FDS_Global              | FDS_AnimalFlesh | FDS_PoorHygiene | FDS_HumanContamination | FDS_Mold | FDS_DecayingFruit | FDS_Fish | FDS_DecayingVegetables | FDS_LivingContaminants | PostExpD | EDEQ_Global | EDEQ_R | EDEQ_EAT | EDEQ_SHAPE | EDEQ_WEIGHT | BMI    | VR_FoodGazes | VR_FoodTouches |
| Kitchen + Avatar | FDS_Global             | Correlation Coefficient | 1.000           | .468*           | .659**                 | .532     | .683*             | .602*    | .650*                  | .731**                 | .608*    | .190        | .451*  | .398     | .472*      | .463*       | .369   | .287         | .020           |
|                  |                        | Sig. (2-tailed)         |                 | .028            | <.001                  | .011     | <.001             | .003     | .001                   | <.001                  | .003     | .397        | .035   | .067     | .027       | .030        | .091   | .195         | .930           |
|                  | FDS_AnimalFlesh        | Correlation Coefficient |                 | 1.000           | .474*                  | .188     | .025              | -.037    | .665**                 | .027                   | -.026    | .386        | .266   | .221     | .376       | .338        | .177   | -.084        | -.224          |
|                  |                        | Sig. (2-tailed)         |                 |                 | .028                   | .023     | .913              | <.001    | .007                   | .910                   | .907     | .010        | .332   | .081     | .437       | .731        | .731   | .317         | -.014          |
|                  | FDS_PoorHygiene        | Correlation Coefficient |                 |                 | 1.000                  | .597**   | .177              | .019     | .534*                  | .575**                 | .257     | .226        | .250   | .291     | .209       | .331        | .212   | -.091        | -.065          |
|                  |                        | Sig. (2-tailed)         |                 |                 |                        | <.001    | .026              | .003     | .431                   | .933                   | .010     | .005        | .248   | .312     | .262       | .189        | .351   | .132         | .774           |
|                  | FDS_HumanContamination | Correlation Coefficient |                 |                 |                        | 1.000    | .373              | .108     | .300                   | .230                   | .375     | -.060       | .169   | .347     | .247       | .150        | .107   | -.016        | .021           |
|                  |                        | Sig. (2-tailed)         |                 |                 |                        |          | .087              | .631     | .174                   | .302                   | .086     | .790        | .452   | .113     | .267       | .507        | .635   | .944         | .442*          |
|                  | FDS_Mold               | Correlation Coefficient |                 |                 |                        |          | 1.000             | .589**   | .338                   | .477*                  | .595**   | -.031       | .334   | .252     | .345       | .295        | .240   | .212         | .086           |
|                  |                        | Sig. (2-tailed)         |                 |                 |                        |          |                   | .004     | .123                   | .025                   | .003     | .890        | .129   | .258     | .115       | .182        | .283   | .344         | .704           |
|                  | FDS_DecayingFruit      | Correlation Coefficient |                 |                 |                        |          |                   | 1.000    | .165                   | .505*                  | .409     | -.001       | .188   | .043     | .116       | .178        | .220   | .557**       | .472*          |
|                  |                        | Sig. (2-tailed)         |                 |                 |                        |          |                   |          | .463                   | .017                   | .059     | .995        | .402   | .848     | .608       | .429        | .325   | .007         | .027           |
|                  | FDS_Fish               | Correlation Coefficient |                 |                 |                        |          |                   |          | 1.000                  | .456*                  | .206     | .539**      | .604** | .569**   | .688**     | .525*       | .463*  | .190         | -.459*         |
|                  |                        | Sig. (2-tailed)         |                 |                 |                        |          |                   |          |                        | .033                   | .358     | .010        | .003   | .006     | <.001      | .012        | .030   | .397         | .082           |
|                  | FDS_DecayingVegetables | Correlation Coefficient |                 |                 |                        |          |                   |          |                        | 1.000                  | .566**   | .146        | .380   | .324     | .269       | .345        | .251   | .248         | .008           |
|                  |                        | Sig. (2-tailed)         |                 |                 |                        |          |                   |          |                        |                        | .006     | .517        | .081   | .142     | .226       | .116        | .260   | .266         | .972           |
|                  | FDS_LivingContaminants | Correlation Coefficient |                 |                 |                        |          |                   |          |                        |                        | 1.000    | .082        | .245   | .312     | .282       | .211        | .161   | .310         | .035           |
|                  |                        | Sig. (2-tailed)         |                 |                 |                        |          |                   |          |                        |                        |          | .716        | .271   | .158     | .203       | .346        | .473   | .161         | .879           |
|                  | PostExpD               | Correlation Coefficient |                 |                 |                        |          |                   |          |                        |                        |          | 1.000       | .776** | .725**   | .716**     | .740**      | .733** | .238         | -.260          |
|                  |                        | Sig. (2-tailed)         |                 |                 |                        |          |                   |          |                        |                        |          |             | <.001  | <.001    | <.001      | <.001       | <.001  | .287         | .383           |
|                  | EDEQ_Global            | Correlation Coefficient |                 |                 |                        |          |                   |          |                        |                        |          |             | 1.000  | .790**   | .934**     | .925**      | .908** | .280         | -.401          |
|                  |                        | Sig. (2-tailed)         |                 |                 |                        |          |                   |          |                        |                        |          |             |        | <.001    | <.001      | <.001       | <.001  | .208         | .065           |
|                  | EDEQ_R                 | Correlation Coefficient |                 |                 |                        |          |                   |          |                        |                        |          |             |        | 1.000    | .757**     | .649**      | .654** | .029         | -.432*         |
|                  |                        | Sig. (2-tailed)         |                 |                 |                        |          |                   |          |                        |                        |          |             |        |          | <.001      | <.001       | <.001  | .898         | .175           |
|                  | EDEQ_EAT               | Correlation Coefficient |                 |                 |                        |          |                   |          |                        |                        |          |             |        |          | 1.000      | .817**      | .806** | .338         | -.374          |
|                  |                        | Sig. (2-tailed)         |                 |                 |                        |          |                   |          |                        |                        |          |             |        |          |            | .002        | <.001  | .124         | .171           |
|                  | EDEQ_SHAPE             | Correlation Coefficient |                 |                 |                        |          |                   |          |                        |                        |          |             |        |          |            | 1.000       | .816** | .175         | -.376          |
|                  |                        | Sig. (2-tailed)         |                 |                 |                        |          |                   |          |                        |                        |          |             |        |          |            |             | <.001  | .435         | .505           |
|                  | EDEQ_WEIGHT            | Correlation Coefficient |                 |                 |                        |          |                   |          |                        |                        |          |             |        |          |            |             | 1.000  | .324         | -.042          |
|                  |                        | Sig. (2-tailed)         |                 |                 |                        |          |                   |          |                        |                        |          |             |        |          |            |             |        | .141         | .851           |
|                  | BMI                    | Correlation Coefficient |                 |                 |                        |          |                   |          |                        |                        |          |             |        |          |            |             |        | .141         | .851           |
|                  |                        | Sig. (2-tailed)         |                 |                 |                        |          |                   |          |                        |                        |          |             |        |          |            |             |        | .141         | .851           |
|                  | VR_FoodGazes           | Correlation Coefficient |                 |                 |                        |          |                   |          |                        |                        |          |             |        |          |            |             |        | .141         | .851           |
|                  |                        | Sig. (2-tailed)         |                 |                 |                        |          |                   |          |                        |                        |          |             |        |          |            |             |        | .141         | .851           |
|                  | VR_FoodTouches         | Correlation Coefficient |                 |                 |                        |          |                   |          |                        |                        |          |             |        |          |            |             |        | .141         | .851           |
|                  |                        | Sig. (2-tailed)         |                 |                 |                        |          |                   |          |                        |                        |          |             |        |          |            |             |        | .141         | .851           |

\*, Correlation is significant at the 0.05 level (2-tailed).

\*\*, Correlation is significant at the 0.01 level (2-tailed).

**Figure S4. The scatter plot figures.**

*(a) The scatter plots of food disgust sensitivity vs eating disorder severity variables (EDE-Q and BMI)*

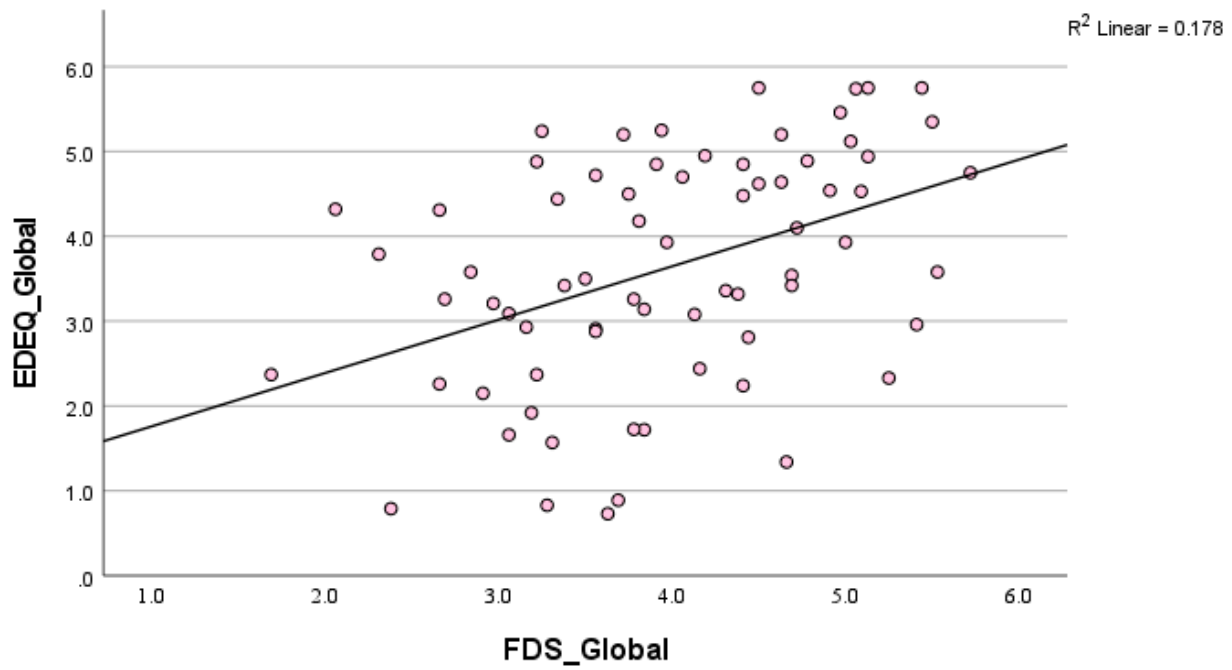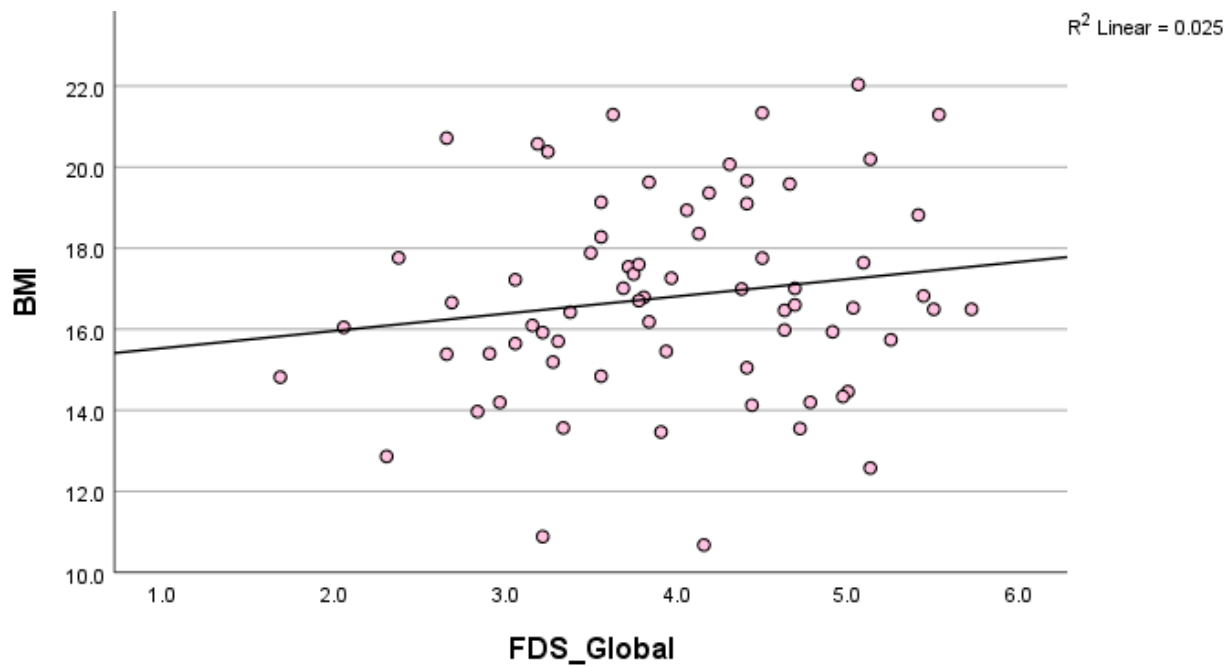

(b) The scatter plots of food disgust sensitivity vs food interaction measures in the VR (eye gazes and touches towards virtual foods)

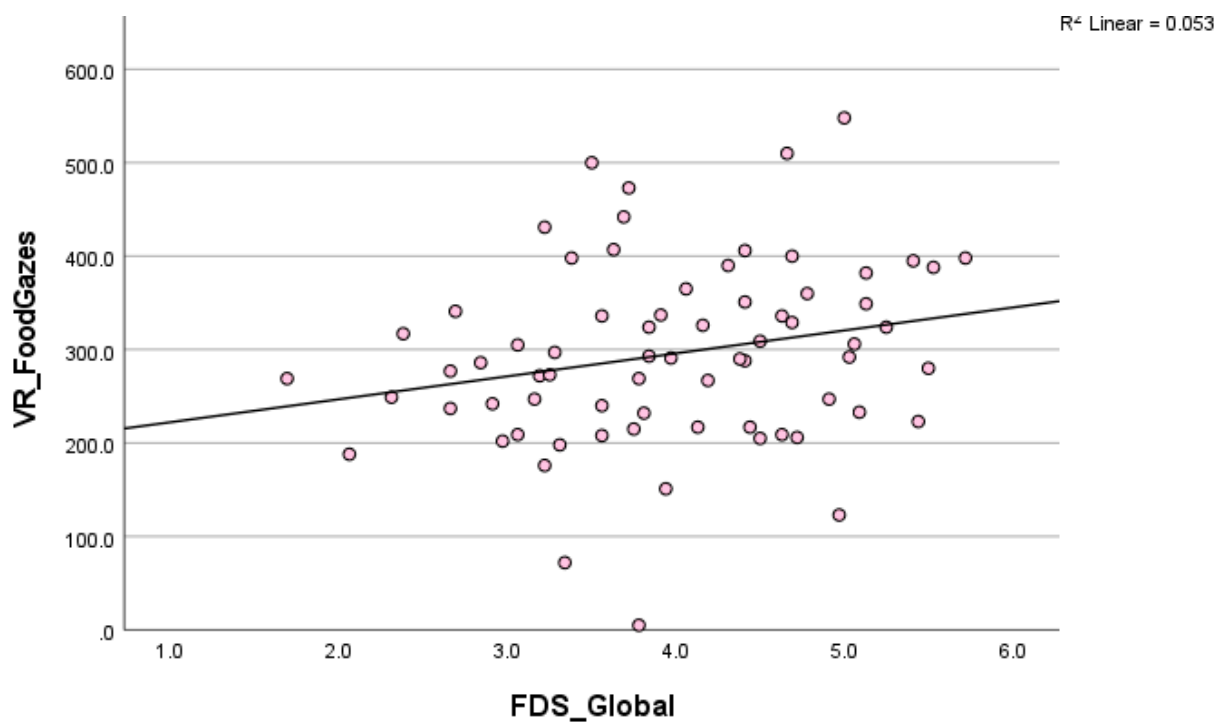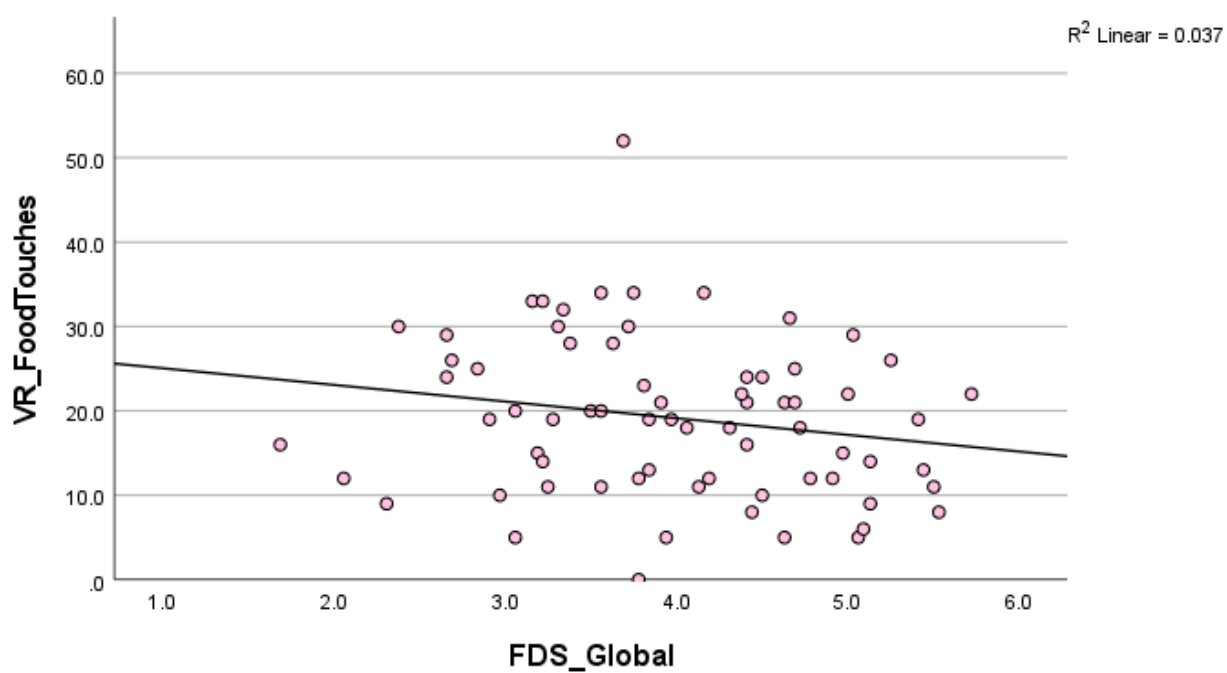



(c) The scatter plots of momentary disgust reactions towards virtual foods with high-calorie content vs eating disorder severity variables (EDE-Q and BMI)

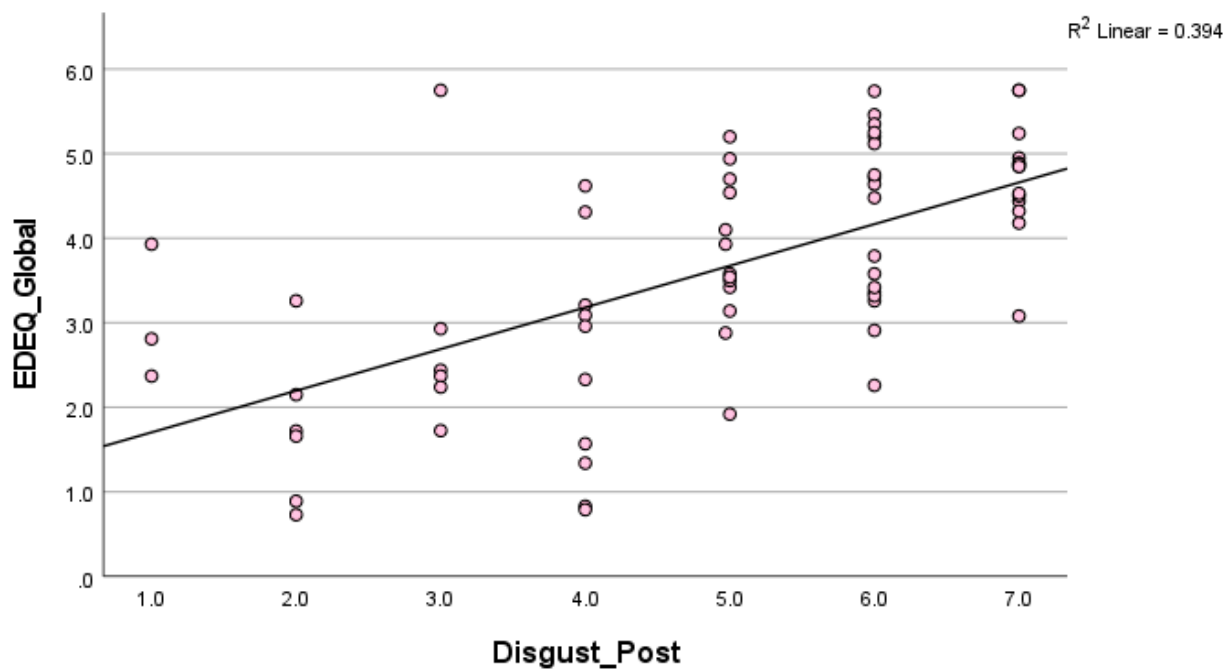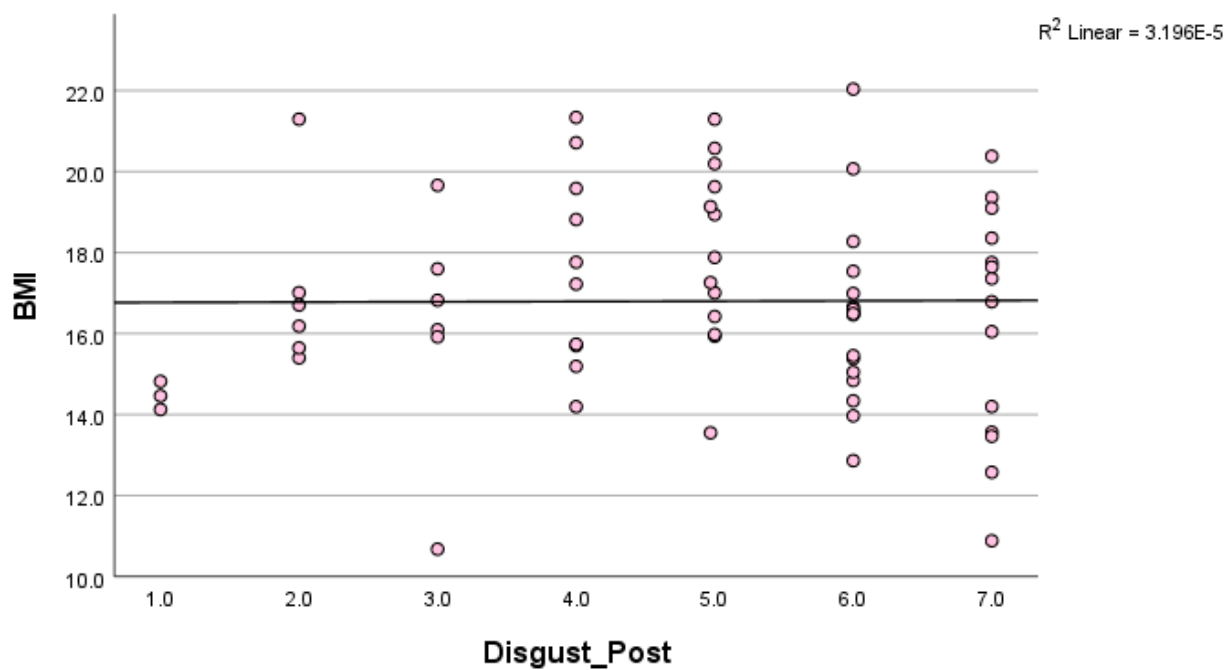

(d) The scatter plots of momentary disgust reactions towards virtual foods with high-calorie content vs food interaction measures in the VR (eye gazes and touches towards virtual foods)

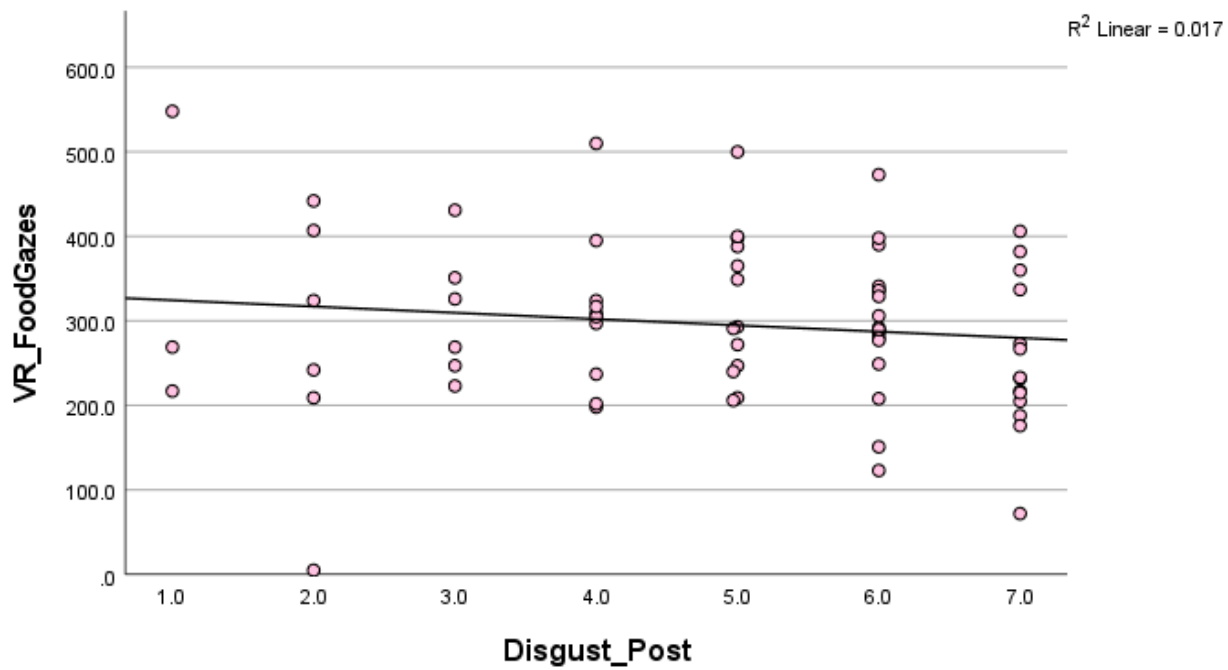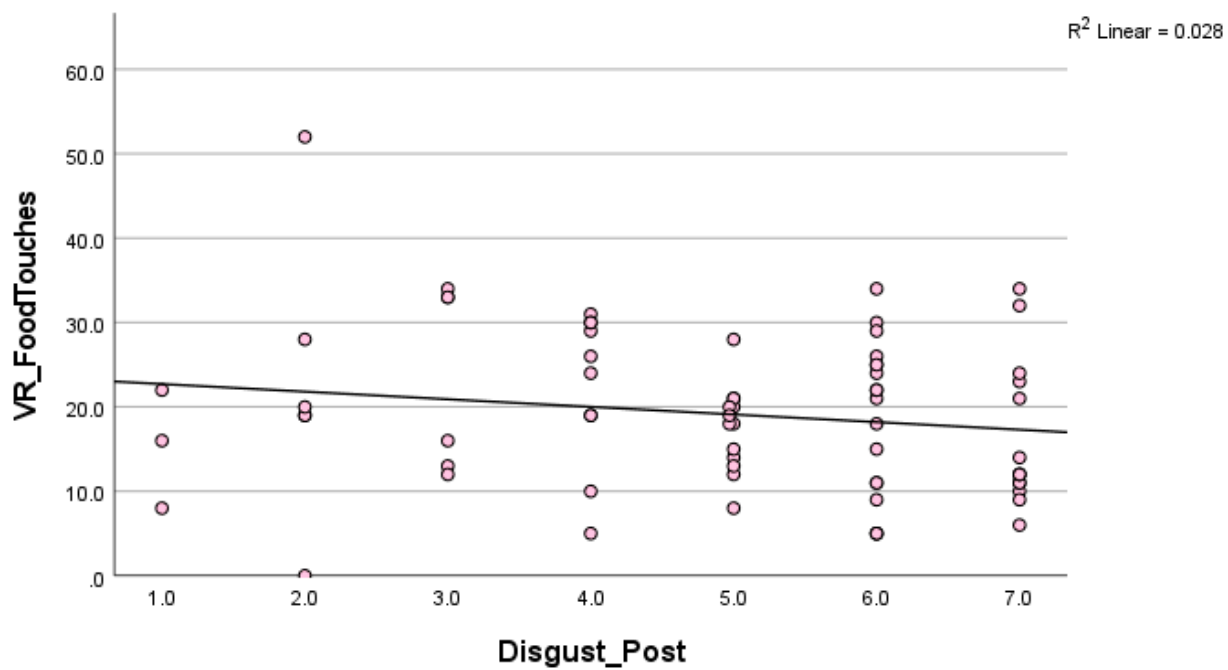

Supplement: s1 [file s1]
